# Supplementary material for: An Amyloid Core Sequence in the Major Candida albicans Adhesin Als1p Mediates Cell-Cell Adhesion
Source: PubMed Central journal article supplement (PMC6786869; doi:10.1128/mbio.01766-19), 2019-10-08
Supplement: mBio.01766-19-sf001.pdf [file mBio.01766-19-sf001.pdf]

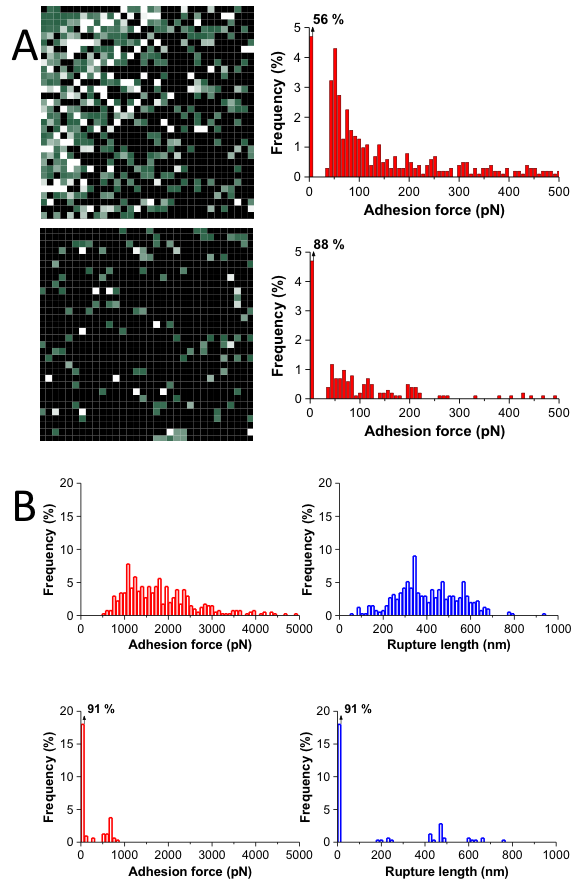

**Supplemental Figure S1.** Effect of the anti-amyloid peptide SNGINIVATTRTV. A) Als1p<sup>WT</sup> was repeatedly mapped on the surface of a cell, generating the data in the top row. Addition of peptide (14  $\mu$ M) led to decreased clustering (second row). B) SCFM analysis of cell-cell binding for a pair of cells (top row). The same cell pair was treated with 14  $\mu$ M peptide (bottom row). Most cell-cell binding was abolished in the presence of peptide.
