# Supplementary material for: An Amyloid Core Sequence in the Major Candida albicans Adhesin Als1p Mediates Cell-Cell Adhesion
Source: PubMed Central journal article supplement (PMC6786869; doi:10.1128/mbio.01766-19), 2019-10-08

**Supplemental Figure S2.** Clustering analyses for successive mappings (left to right) of V5-Als1p on the surface of live cells. On each map, black pixels denote regions where a V5 epitope was detected. Beneath the map is a graph showing the mean adjacency value for the map (orange line) and a histogram of adjacency values for  $10^5$  simulations. The  $p$  value for the measured adjacency is also given for each graph. A) cells expressing Als1p<sup>WT</sup> B) cells expressing Als1p<sup>V326N</sup>.

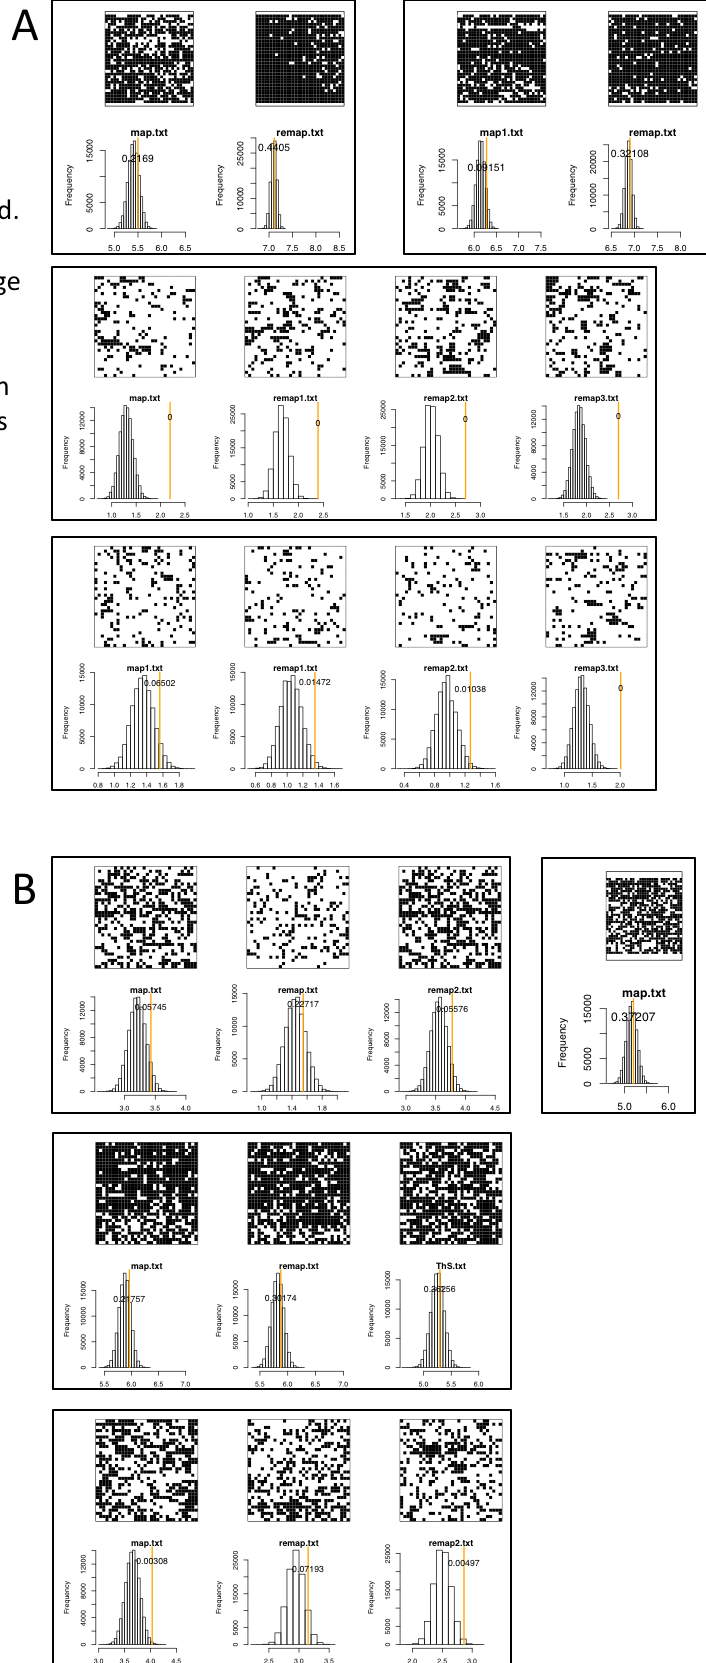

Supplement: mBio.01766-19-sf002.pdf [file mBio.01766-19-sf002.pdf]
